# Supplementary material for: Continuous curvilinear capsulorhexis training models for medical students: who might they benefit the most?
Source: Research Square preprint supplement (doi:10.21203/rs.3.rs-6686867/v1), 2025-06-18
Supplement: Supplementary file 1 [file 6b209262e51d361f1abca60f.docx]

| **Item** | **Assessment** | | | **Score** |
| --- | --- | --- | --- | --- |
|  | **1** | **2** | **3** |  |
| Time to complete | Continuous, in seconds | | |  |
| Hand movements | Unnecessary movements | Near suitable | Suitable |  |
| Instrument handling | Awkward handling | Fair use of instruments | Good handling |  |
| Errors/complications | Multiple errors | Few errors | No errors |  |
| Number of entries into chamber | Excessively high | Not so high | Few entries |  |
| Incisional stress | Severe stress | Some stress | No stress |  |
| CCC size | Unsuitable | Near suitable | Suitable |  |
| Continuity of CCC | Not continuous | Continuous | \ |  |
| Shape | Irregular | Almost round | Perfectly round |  |
| Centering | Poorly centered | Near centered | Well centered |  |
| Device movements (microscope or eye) | Too many movements | Some movements | Economy of movement |  |
| Overall score | Sum of 1-11 above* | | |  |

CCC = continuous curvilinear capsulorhexis

*Within the overall score, time was assessed using a predefined scoring system of 7 points, where time was binned into 1.5 minute intervals (*e.g.*; 0-90 seconds = 7; 90-180 seconds =6) up to >540 seconds, which was given a score of 1

**Supplementary Material 1.** Assessment score for capsulorhexis performance on a synthetic eye
