# Supplementary material for: Continuous curvilinear capsulorhexis training models for medical students: who might they benefit the most?
Source: Research Square preprint supplement (doi:10.21203/rs.3.rs-6686867/v1), 2025-06-18
Supplement: Supplementary file 2 [file a90036858ddffd2bd62eb6b8.docx]

1. Baseline questionnaire (*to be completed prior to the beginning of the study*):

**Question 1** - Have you ever used a virtual-reality simulator before?

1. YES
2. NO

If so, in what context and for how long?

__________________________________________________________________________________

**Question 2** - Have you ever worked on a synthetic eye model before?

1. YES
2. NO

If so, in what context and for how long?

__________________________________________________________________________________

**Question 3** - Do you regularly play video games?

1. YES
2. NO

If so, what type of video games and how often?

__________________________________________________________________________________

**Question 4** - Do you regularly play a musical instrument?

1. YES
2. NO

If so, what type of instrument and how often?

__________________________________________________________________________________

**Question 5** - Which specialty would you like to choose as a resident?

1. Medical specialty
2. Surgical specialty
3. Surgical specialty including microsurgery

**Question 6** - On a scale from 1 to 4, how confident would you feel about performing a microsurgical procedure (circle your answer)?

1 = not confident at all; 2 = not very confident; 3 = fairly confident; 4 = fully confident

1. Post-training questionnaire (*to be completed at the end of the study*):

**Question 1** - Which specialty would you like to choose as a resident?

1. Medical specialty
2. Surgical specialty
3. Surgical specialty including microsurgery

**Question 2** - On a scale from 1 to 4, how confident would you feel about performing a microsurgical procedure (circle your answer)?

1 = not confident at all

2 = not very confident

3 = fairly confident

4 = fully confident

**Question 3 -** Ona scale from 1 to 4, how much did you enjoy the proposed training (circle your answer)?

1 = not appreciated at all

2 = little appreciated

3 = rather appreciated

4 = fully appreciated

**Question 4** - On a scale from 1 to 4, how frustrated did you feel by the proposed training (circle your answer)?

1 = not at all frustrated

2 = a little frustrated

3 = rather frustrated

4 = fully frustrated

**Question 5** - On a scale from 1 to 4, how much would you like to discover the other stages of cataract surgery on this device (circle your answer)?

1 = don’t want to discover at all

2 = quite want to discover

3 = rather want to discover

4 = fully want to discover

**Question 6 -** On a scale from 1 to 4, to what extent do you think this program should be offered to medical students as part of their medical training (circle your answer)?

1 = should not be offered at all

2 = minimal interest in it being offered

3 = quite an interest in it being proposed

4 = should absolutely be offered

**Supplementary Material 2.** Questionnaires to be filled out by participants during the study. **A.** Baseline questionnaire to be fill out before starting the evaluations. **B.** Post-training questionnaire to be completed at the end of the study
